# Supplementary material for: A miR-567-PIK3AP1-PI3K/AKT-c-Myc feedback loop regulates tumour growth and chemoresistance in gastric cancer
Source: PubMed Central journal article supplement — eBioMedicine. 2019 May 9;44:311–21. doi: 10.1016/j.ebiom.2019.05.003 (PMC6603849; doi:10.1016/j.ebiom.2019.05.003), 2019-05-09
Supplement: mmc1.pdf [file mmc1.pdf]

1 **Supplementary Figures**

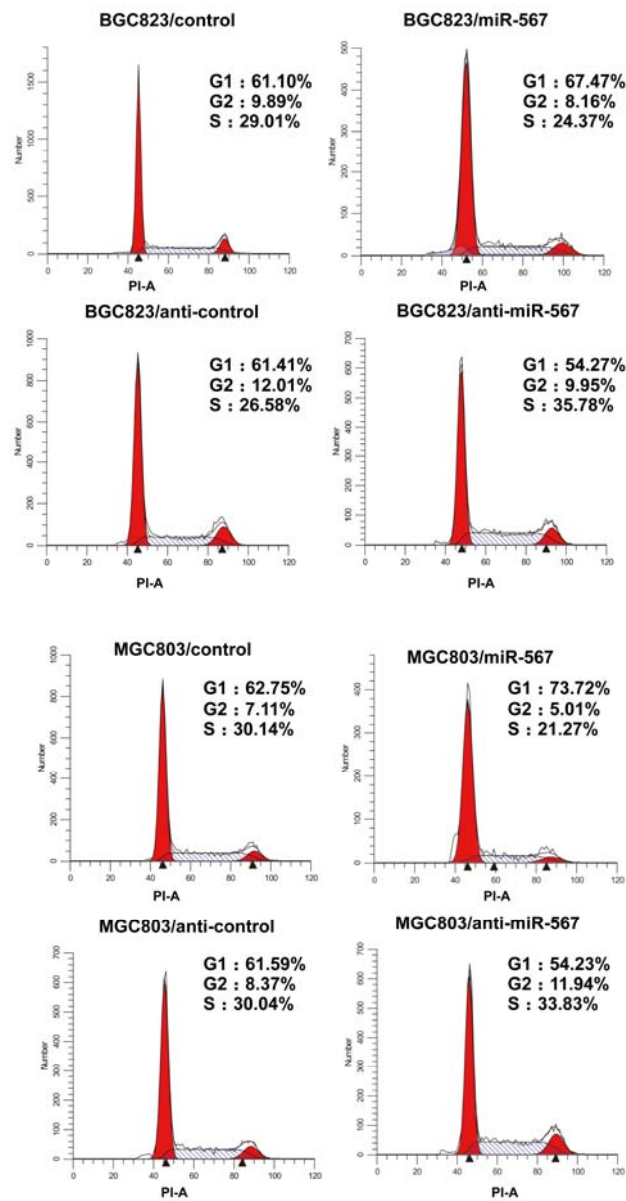

2

3

4 **Supplementary Figure 1.** Representative figures of cell cycle assay in Fig.2A.

5

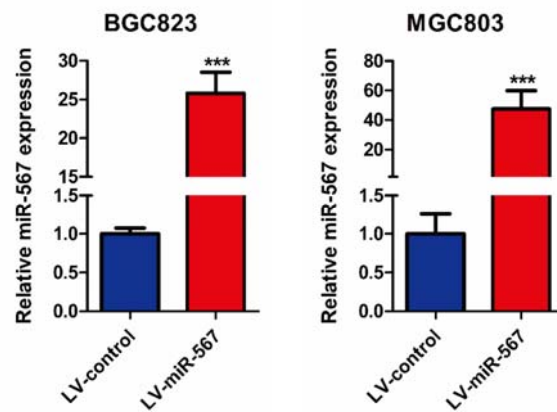

6

7 **Supplementary Figure 2.** Real-time PCR was performed to detect the mRNA expression

8 of miR-567 in MGC803 and BGC823 cells, both transfected with LV-miR-NC or LV-

9 miR-567, Student's t-test, mean  $\pm$  SD, \*\*\*  $P < 0.001$ .

10

11

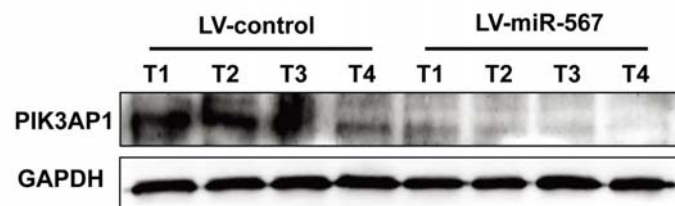

12

13 **Supplementary Figure 3.** Western blot was performed to detect the protein expression of

14 PIK3AP1 in MGC803 cells after treated with LV-miR-NC or LV-miR-567.

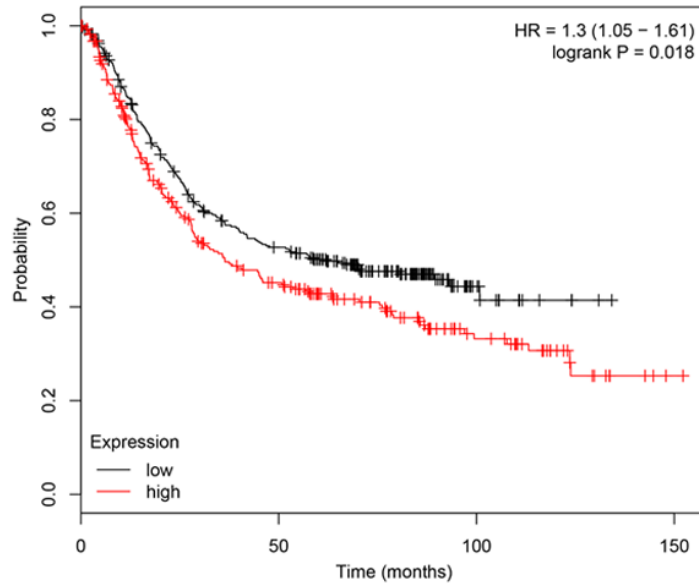

15

16 **Supplementary Figure 4.** Kaplan-Meier survival plots showed that higher expression of

17

PIK3AP1 resulted in a worse survival.

18

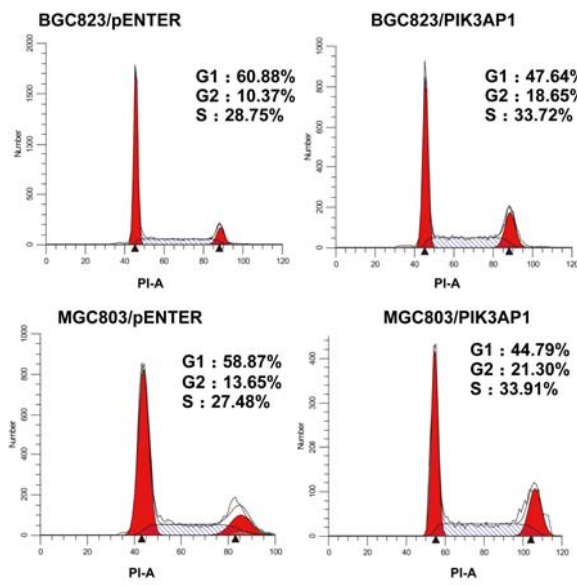

19

20 **Supplementary Figure 5.** Representative figures of cell cycle assay in Fig. 3F.

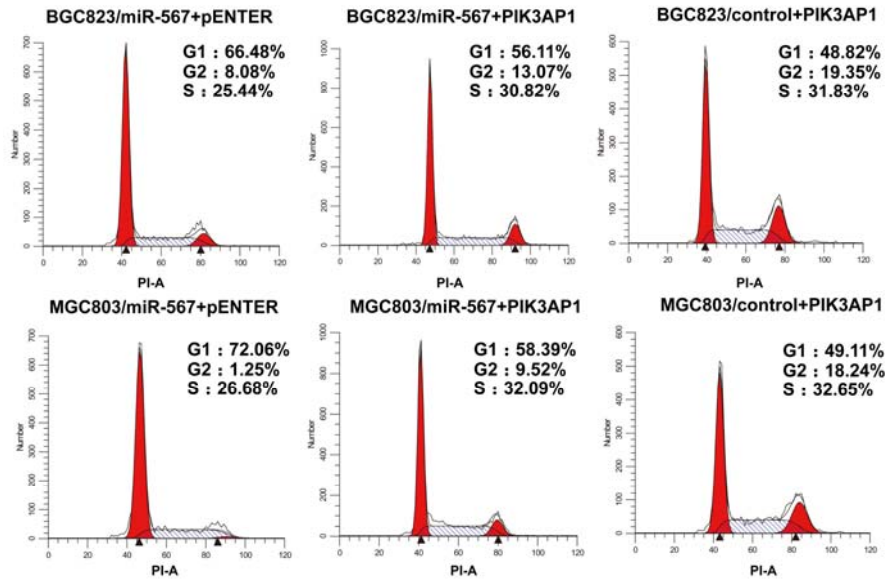

21

22

**Supplementary Figure 6.** Representative figures of cell cycle assay in Fig. 5C.

## Supplementary Materials and Methods

### RNA isolation, reverse transcription, and quantitative real-time PCR

Total RNA was extracted using Trizol reagent (Invitrogen). To quantitate PIK3AP1 and c-Myc expression, total RNA was polyadenylated and underwent reverse transcription using PrimeScript™ RT Master Mix (TaKaRa, Dalian, China). Real-time PCR was carried out using a SYBR® Premix Ex Taq™ II (TaKaRa, Dalian, China) on an ABI 7500HT system. To quantitate miR-567 expression, total RNA was polyadenylated and underwent reverse transcription using an NCode miRNA First-Strand cDNA Synthesis kit (Invitrogen). Real-time PCR was carried out using an SYBR Green PCR master mix (Applied Biosystems; Foster City, Calif, USA) on an ABI 7500HT system. *GAPDH* or *U6* snRNA were used as an endogenous control. All samples were normalized to internal controls, and fold changes were calculated through relative quantification ( $2^{-\Delta\Delta CT}$ ). The primers used are shown in Supplementary Table S1&S2.

### Cell proliferation assays and colony formation

Cell proliferation assays were carried out using Cell Counting Kit 8 (CCK8) (Dojindo; Kumamoto, Japan). Cells were plated in 96-well plates at a density of  $1 \times 10^4$  cells per well and cultured in the growth medium. At the indicated time points, the number of cells in triplicate wells was measured at an absorbance at 450 nm of reduced WST-8 (2-(2-methoxy-4-nitrophenyl)-3-(4-nitrophenyl)-5-(2,4-disulfophenyl)-2H-tetrazolium monosodium salt). For the colony-formation assay, 400 viable cells were placed in each well in 6-well plates and maintained in a complete medium for 2 weeks. Colonies were fixed with methanol and stained with 0.1% (w/v) crystal violet.

### Cell cycle analysis and EdU incorporation assay

46 Cells ( $1 \times 10^6$ ) were collected, washed with phosphate buffer solution (PBS). The cells  
47 were resuspended in 1 ml DNA staining solution (MULTI SCIENCE; Hangzhou, China),  
48 then vortex the mix for 10 seconds. The mixture was then incubated at room temperature  
49 for 30 min in the dark. Analysis of cell cycle was carried out using flow cytometry.  
50 For EdU incorporation assay, proliferating GC cells were examined using the Cell-Light  
51 EdU Apollo 488 or 567 In Vitro Imaging Kit (RiboBio) according to the manufacturer's  
52 protocol. Briefly, plate  $1 \times 10^5$  cells on well of a 6-well plate and incubate overnight, after  
53 incubation with 20  $\mu$ M EdU labeling solution under appropriate growth condition for 2 h,  
54 GC cells were fixed with 4% paraformaldehyde for 15min at room temperature, remove  
55 paraformaldehyde and wash twice with 1ml of 3% BSA in PBS, then remove wash  
56 solution and add 1 ml of in 0.3% Triton X-100 in PBS to each well and incubate for 20  
57 minutes at room temperature. Stained the cells with Apollo fluorescent dyes and  
58 protected from light. A total of 5  $\mu$ gml<sup>-1</sup> of DAPI were used to stain cell nuclei for 10 min,  
59 then wash each well with 1ml PBS. The mean number of EdU-positive cells was counted  
60 for each well under a fluorescent microscope in five random fields. Photoshop 6.0  
61 software was applied for cell counting. All assays were independently performed for  
62 three times.

### 63 **Tumor growth assay**

64 For the tumor growth assay,  $1 \times 10^6$  stable transfected cells were independently injected  
65 subcutaneously into the left back of nude mice (n = 4/group). After 4 wk, 150 mg/kg  
66 luciferin was intraperitoneally injected into each mouse 10 min before imaging. Caliper  
67 IVIS Lumina II (Caliper Life Sciences, Hopkinton, MA, USA) was used for  
68 bioluminescence imaging of tumor growth. Mice were sacrificed 28 days after cell

69 injection, and tumors were dissected and weighted.

#### 70 **Lentiviruses transfection assay**

71 Lentiviruses overexpressing human miR-567 and empty vector were built by Suzhou  
72 GenePharma, Co. Ltd. (Suzhou, China). For lentiviral transfection of MGC803 and  
73 BGC823 cells, 100 multiplicity of infection LV-miR-567 or empty vector lentiviruses  
74 were added to a well containing  $5 \times 10^4$  cells, medium and 8  $\mu\text{g/ml}$  polybrene. After 24 h  
75 of incubation, transfected cells were selected with 2  $\mu\text{g/ml}$  puromycin (Sigma-Aldrich).  
76 Empty vector lentivirus was used as a control. Selected cells were maintained in growth  
77 medium with 0.5  $\mu\text{g/ml}$  puromycin.

#### 78 **Immunohistochemistry (IHC)**

79 Dako Envision two-step method of immunohistochemistry was used according to the  
80 manufacturer's instructions. The tumour sections (3 $\mu\text{m}$ ) were first deparaffinized and  
81 hydrated through graded alcohol to water. Then, antigen retrieval was performed by high-  
82 pressure heat in citrate buffer for 5 minutes. After natural cooling, the sections were  
83 treated with 3% H<sub>2</sub>O<sub>2</sub> for 15 minutes to eliminate intrinsic peroxidase activity. Then the  
84 sections were incubated with primary antibodies overnight at 4°C. The primary  
85 antibodies include: mouse antibody to CCND1 (60186-1-Ig, Proteintech, Wuhan, China  
86 dilution 1:300), and rabbit antibody to Ki-67 (27309-1-AP, Proteintech, Wuhan, China,  
87 dilution 1:1000). After washing with PBS for 3 times, the sections were incubated with  
88 the biotinylated secondary antibodies (dako, Denmark; Glostrup) for 60 minutes at room  
89 temperature. Sections were visualized with 3,3'-diaminobenzidine DAB and  
90 counterstained with hematoxylin for 30 seconds and then dehydrated and mounted in  
91 neutral gum.

92 **Luciferase reporter assay**

93 PIK3AP1 was predicted to be directly regulated by miR-567 using TargetScan software.  
94 A 400-bp fragment of PIK3AP1 3'UTR amplified by PCR primers was cloned into  
95 psiCHECK-2 vectors (named wt). The primers were 5'-  
96 CGGTCGCGCTCGAGTGGGACTTGAGCATTT-3' (forward) and 5'  
97 ATTTGCGGCCGCGGATCACTGAGGGAACA-3' (reverse). Site-directed mutagenesis  
98 of the miR-567 binding site in the PIK3AP1 3'UTR (named mt) was performed using  
99 GeneTailor Site-Directed Mutagenesis System (Invitrogen). For reporter assays, wt or mt  
100 vector and the control vector psiCHECK-2 vector were cotransfected into BGC823,  
101 MGC803 and 293T cells with miR-567 mimics. Luciferase activity was measured at 48 h  
102 after transfection using the Dual-Luciferase Reporter Assay System (Promega  
103 Corporation, Madison, WI, USA).

104 To generate a miR-567 promoter vector, a 2,000-bp fragment containing one binding site  
105 of c-Myc was PCR-amplified and inserted into a psiCHECK-2 luciferase reporter vector.  
106 In addition, c-Myc-binding site mutation vectors were constructed. These psiCHECK-2-  
107 derived vector and c-Myc-expressing vectors were cotransfected into 293T or MGC803  
108 and BGC823 cells using Lipofectamine 2,000 Reagent (Invitrogen).

109 **Chromatin immunoprecipitation assay**

110 According to the manufacturer's instructions, ChIP assay was performed to examine  
111 whether c-Myc combined to miR-567 promoter by a ChIP assay kit (Millipore, catalog:  
112 17-371). MGC803 and BGC823 cells were firstly fixed with 1% formaldehyde to  
113 covalently crosslink proteins to DNA and then chromatin was harvested from the GC  
114 cells. Crosslinked DNA was sheared to 200–1,000 base pairs in length with sonication



115 and then subjected to an immmmunoselection process, which required the use of Anti-c-  
116 Myc antibody (Abclone). Finally, PCR was used to measure enrichment of DNA  
117 fragments in the putative c-Myc-binding sites in the miR-567 promoter on the basis of the  
118 specific primers, the primers were 5'- AGGCAGAGGTCCTAAAGTAT-3' (forward)  
119 and 5'- AGGGCTGAGGTCACAAT-3' (reverse).

## 120 **References**

- 121 1. Zhao, M., et al., miR-3188 regulates nasopharyngeal carcinoma proliferation and  
122 chemosensitivity through a FOXO1-modulated positive feedback loop with mTOR-p-  
123 PI3K/AKT-c-JUN. *Nat Commun*, 2016. 7: p. 11309.
- 124 2. Niu, Y., et al., LASP1-S100A11 axis promotes colorectal cancer aggressiveness  
125 by modulating TGF $\beta$ /Smad signaling. *Sci Rep*, 2016. 6: p. 26112.
- 126 3. Yang, Y., et al., Epithelial-mesenchymal transition and cancer stem cell-like  
127 phenotype induced by Twist1 contribute to acquired resistance to irinotecan in colon  
128 cancer. *Int. J. Oncol.*, 2017. 51(2): p. 515-524.

129

**Supplementary Table S1.** RT-PCR primer sequences for human genes

| <b>Gene name</b> | <b>Forward primer</b>  | <b>Reverse primer</b>   | <b>Product length</b> |
|------------------|------------------------|-------------------------|-----------------------|
| <b>PIK3AP1</b>   | CCCAGAGGATGCGACATC     | GACAGCAGCACCACGACA      | 197 bp                |
| <b>c-Myc</b>     | TACAACACCCGAGCAAGGAC   | AGCTAACGTTGAGGGGCATC    | 189 bp                |
| <b>GAPDH</b>     | AAGGTCGGAGTCAACGGATTTG | CCATGGGTGGAATCATATTGGAA | 159 bp                |

**Supplementary Table S2.** RT-PCR primer sequences for miR-567

| <b>Gene name</b> | <b>Primer</b>              | <b>Product length</b> |
|------------------|----------------------------|-----------------------|
| <b>miR-567</b>   | AGTATGTTCTTCCAGGACAGAACAAA | 197 bp                |
